# Supplementary material for: Subregional amygdala functional connectivity abnormalities and anhedonia impairments in first-episode schizophrenia
Source: Research Square preprint supplement (doi:10.21203/rs.3.rs-6638280/v1), 2025-05-27
Supplement: Supplementary file 1 [file b9ceb186e0b361a30244a62d.docx]

| **Table S1** Demographic data and clinical characteristics in FES patients with/or without medication. | | | | |
| --- | --- | --- | --- | --- |
| **Items** | **FES with medication**  **（n = 20）** | **FES without medication**  **（n = 11）** | **χ2/t value** | ***P***  **values** |
| Gender (male/female) | 12/8 | 5/6 | -a | 0.48 |
| Age (year) | 26.00±7.51 | 23.09±5.17 | 1.14 | 0.26 |
| Education (year) | 10.85±3.54 | 11.55±2.77 | 0.56 | 0.58 |
| Disease duration (month) | 7.15±6.29 | 10.91±7.87 | 1.46 | 0.16 |
| PANSS |  |  |  |  |
| Positive symptom | 16.40±3.83 | 19.82±6.57 | 1.84 | 0.08 |
| Negative symptom | 14.00±4.16 | 13.18±4.09 | 0.53 | 0.60 |
| General Psychopathology Symptom | 62.30±5.42 | 38.00±11.94 | 1.84 | 0.16 |
| Total scores | 62.70±10.09 | 71.00±20.88 | 1.50 | 0.24 |
| SHAPS scores | 29.95±4.96 | 31.18±6.15 | 0.61 | 0.55 |
| a, chlorpromazine equivalent 1; b, χ2 value, Pearson's chi-squared test; c, t value, independent samples t-test.  Abs. PANSS, Positive and Negative Syndrome Scale; SHAPS, Snaith-Hamilton Pleasure Scale. | | | | |
